# Supplementary material for: Analysis of Xq27-28 linkage in the international consortium for prostate cancer genetics (ICPCG) families
Source: BMC Med Genet. 2012 Jun 19;13:46. doi: 10.1186/1471-2350-13-46 (PMC3495053; doi:10.1186/1471-2350-13-46)
Supplement: Additional file 1 — Table S1. Markers genotyped and used in the linkage analyses by each data collection group [3]. [file 1471-2350-13-46-S1.pdf]

**Table 1 - Markers genotyped and used in the linkage analyses by each data collection group.**

| Marker            | JHU<br>1998 | Mayo<br>1998 | Finn<br>1998 | Swed<br>1998 | BC/CA/HI | FHCRC | Finn | France | JHU<br>(GW) | Mayo<br>(GW) | Michigan | Sweden | UK | Ulm | Utah |
|-------------------|-------------|--------------|--------------|--------------|----------|-------|------|--------|-------------|--------------|----------|--------|----|-----|------|
| <b>DXS1216*</b>   |             |              |              |              |          |       | 10   |        | 191         |              | 174      | 67     |    |     |      |
| <b>DXS6800</b>    |             |              |              |              |          | 186   |      |        |             |              |          |        | 64 |     |      |
| <b>DXS986</b>     |             |              |              |              |          |       | 10   |        | 191         | 161          | 174      | 67     |    |     |      |
| <b>DXS990</b>     |             |              |              |              |          |       | 10   |        | 191         | 161          | 174      | 67     |    |     |      |
| <b>DXS6789</b>    |             |              |              |              |          | 186   |      |        |             |              |          |        | 64 |     |      |
| <b>DXS1106</b>    |             |              |              |              |          |       | 10   |        | 191         | 161          | 174      | 67     |    |     |      |
| <b>DXS6797</b>    |             |              |              |              |          | 186   |      |        |             |              |          |        | 64 |     |      |
| <b>GATA172D05</b> |             |              |              |              |          | 186   |      |        |             |              |          |        | 64 |     |      |
| <b>DXS8055</b>    |             |              |              |              |          |       | 10   |        | 191         | 161          | 174      | 67     |    |     |      |
| <b>DXS1001</b>    |             |              |              |              |          |       | 10   |        | 191         | 161          | 174      | 67     |    |     |      |
| <b>GATA165B12</b> |             |              |              |              |          | 186   |      |        |             |              |          |        | 64 |     |      |
| <b>DXS1047</b>    |             |              |              |              |          | 186   | 10   |        | 191         | 161          | 174      | 67     | 64 |     |      |
| DXS1192           |             |              |              |              |          |       |      |        |             |              |          |        |    |     | 146  |
| DXS1232           | 139         | 123          | 57           |              |          |       |      |        |             | 161          |          |        |    |     |      |
| <b>DXS984</b>     | 139         | 123          | 57           | 41           |          | 186   | 10   | 66     | 191         | 161          | 174      | 67     |    | 104 | 146  |
| <b>GATA31E08</b>  |             |              |              |              | 100      | 186   |      |        |             |              |          |        | 64 |     |      |
| DXS1205           | 139         | 123          | 57           |              |          |       |      |        |             | 161          | 153      |        |    |     |      |
| <b>DXS1227</b>    |             |              |              |              |          |       | 10   |        | 191         | 161          | 174      | 67     |    |     |      |
| <b>DXS6751</b>    | 139         | 123          | 57           |              | 100      |       |      |        |             | 161          |          |        |    | 104 |      |
| <b>DXS6798</b>    | 139         |              | 57           |              |          |       |      |        |             |              |          |        |    |     | 146  |
| DXS8106           | 139         | 123          | 57           |              | 100      | 186   |      | 66     |             | 161          |          |        |    | 103 |      |
| <b>DXS7127</b>    |             |              |              |              | 100      |       |      |        |             |              |          |        | 64 |     |      |
| <b>DXS6806</b>    | 139         | 123          | 57           | 41           |          | 186   |      |        |             | 161          |          |        |    |     |      |
| <b>DXS8043</b>    | 139         | 123          | 57           | 41           |          |       | 10   |        | 191         | 161          | 174      | 67     |    |     |      |
| MXMAF<br>MA113ZF5 |             |              | 57           |              |          |       |      |        |             | 161          |          |        |    |     |      |
| <b>DXS1200</b>    | 139         | 123          | 57           | 41           | 100      | 186   |      | 66     |             | 161          | 153      |        |    | 104 | 146  |
| DXS297            | 139         | 123          | 57           |              |          | 186   |      |        |             | 161          |          |        |    |     |      |
| DXS731            |             |              |              |              |          |       |      |        |             | 161          |          |        |    |     |      |

|                                            |            |            |           |           |            |            |           |  |            |            |            |           |            |            |
|--------------------------------------------|------------|------------|-----------|-----------|------------|------------|-----------|--|------------|------------|------------|-----------|------------|------------|
| MXMAFM323Y<br>F1                           |            |            |           |           |            |            |           |  |            | 161        |            |           |            |            |
| <b>DXS8091</b>                             | <b>139</b> | <b>123</b> | <b>57</b> |           |            |            | <b>10</b> |  | <b>191</b> | <b>161</b> | <b>174</b> | <b>67</b> |            |            |
| <b>AFM136yb10<br/>(MXMAFM136<br/>YB10)</b> | 139        | 123        | 57        |           |            |            |           |  |            | 161        |            |           |            | <b>146</b> |
| MXMAFMA107<br>XF5                          |            |            |           |           |            |            |           |  |            | 161        |            |           |            |            |
| <b>DXS1193</b>                             | <b>139</b> |            | <b>57</b> | <b>41</b> | <b>100</b> | <b>186</b> |           |  |            |            | <b>153</b> |           | <b>103</b> | <b>146</b> |
| DXS1123                                    |            |            |           |           |            |            |           |  |            | 161        |            |           |            |            |
| <b>DXS8069</b>                             | <b>139</b> | <b>123</b> | <b>57</b> | <b>41</b> |            | <b>186</b> |           |  |            | 161        |            |           |            | <b>146</b> |
| DXS8011                                    | 139        |            | 57        |           |            |            |           |  |            |            |            |           |            |            |
| DXS8103                                    | <b>139</b> | <b>123</b> | <b>57</b> | <b>41</b> |            | <b>186</b> |           |  |            | <b>161</b> |            |           |            | <b>146</b> |
| AFMa225xh9<br>(MXMAFMA22<br>5XH9)          | 139        | 123        | 57        |           |            |            |           |  |            | 161        |            |           |            | 146        |
| MXMAFMA082<br>XA5                          |            |            |           |           |            |            |           |  |            | 161        |            |           |            |            |
| <b>DXS1073</b>                             |            |            |           |           |            |            | <b>10</b> |  | <b>191</b> | <b>161</b> | <b>174</b> | <b>67</b> |            | <b>146</b> |

\* Yellow-shaded, bolded text indicates markers included in the GWS marker set for each sample and blue-shaded, non-bolded text indicates markers also included in the GWS plus fine-mapping marker set. Yellow-shaded, bolded text of the marker name indicates that it served as a GWS marker for at least one sample, but some of these markers served only as finemapping markers in some densely typed data sets. The first four columns indicate families that were included in the original linkage paper [3]. Numbers in the table represent the number of families genotyped for each marker in each dataset.
